# Supplementary material
Source: Springer Nature journal article supplement (https://www.springermedizin.de/resource/supplementary/12943_2009_537_MOESM3_ESM.pdf/9554696)

## A CD4+CD25+ T cells

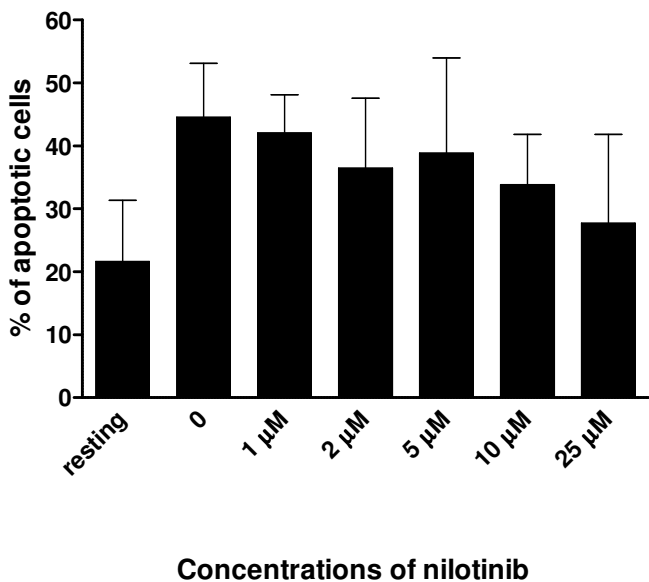

## B CD4+CD25- T cells

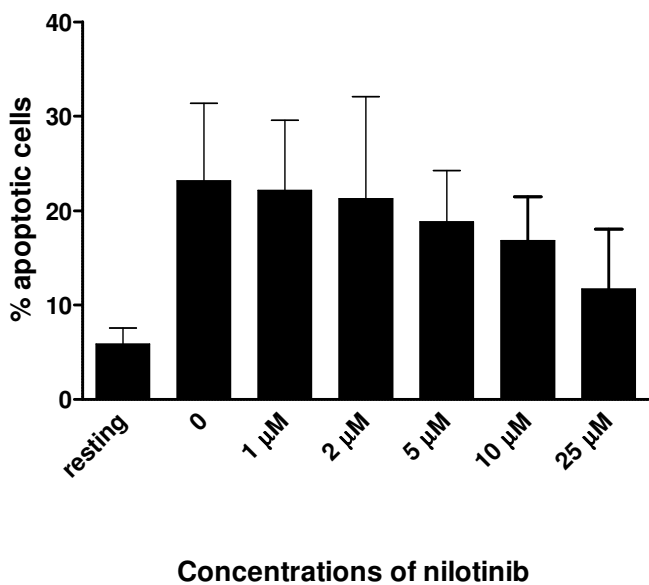

Supplement: MOESM3 [file 9554696]
